# Supplementary material for: Effect of Light Intensity on Morphology, Photosynthesis and Carbon Metabolism of Alfalfa (Medicago sativa) Seedlings
Source: MDPI journal article supplement (doi:10.3390/plants11131688), 2022-06-25
Supplement: s1 [file s1]

Supplementary material

Effect of Light Intensity on Morphology, Photosynthesis and Carbon Metabolism of Alfalfa (*Medicago Sativa*) Seedlings

Number of Figures: 1

Number of Tables: 9

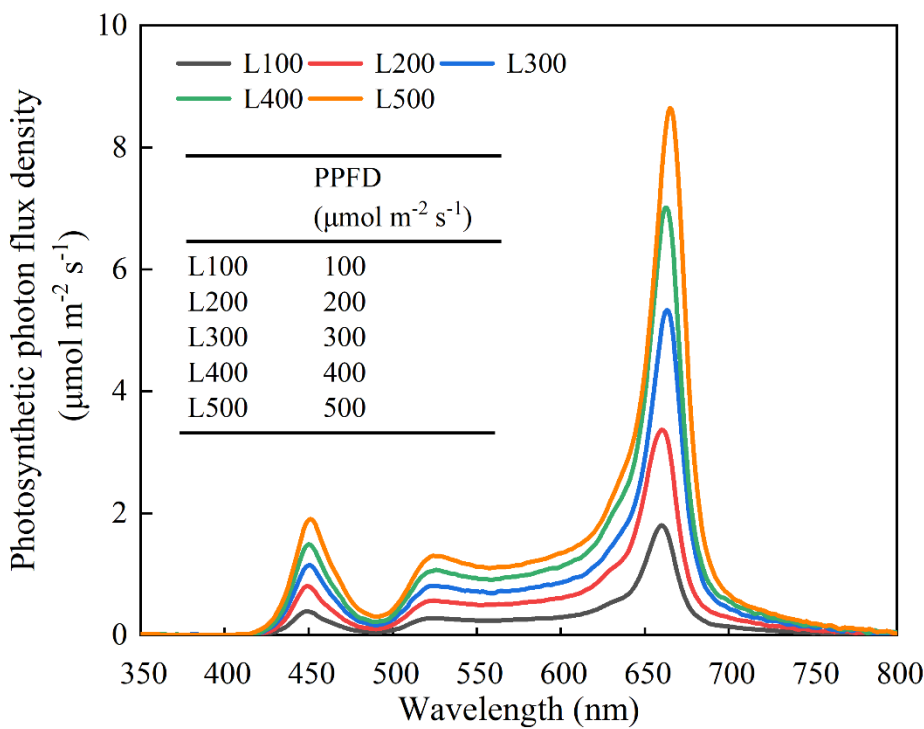

Figure S1. The spectral distribution of LED lights under different light intensity treatments.

Table S1. List of primers for characterizing alfalfa genes (5' - 3') measured under different light treatments. *RCA*, *RbcL*, *RbcS*, *FBPase*, *TK* and *PGK* involve in Rubisco activase, Rubisco large subunit, Rubisco small subunit, Fructose-1,6-bisphosphatase, Transketolase, and Phosphoglycerate kinase, respectively. *SS* and *SPS* genes involve in sucrose synthase and sucrose phosphate synthase, respectively. *AGPase*, *SSS*, *SBE*, and *SP* involve in ADP-glucose pyrophosphorylase, soluble starch synthase, starch branching enzyme and starch phosphorylase, respectively.

| Location                                  | Gene          | Forward primer       | Reverse primer        |
|-------------------------------------------|---------------|----------------------|-----------------------|
| <i>MS.gene63480.t1</i>                    | <i>RCA</i>    | CAGGTCGTATGGGTGGAACC | GAGTTGGACATTGGTGGGGT  |
| <i>FKU49_pgp074</i><br><i>NC_042841.1</i> | <i>RbcL</i>   | TTCCGAGTAAGTCCGCAACC | TCCATCGGTCCACACAGTTG  |
| <i>MS.gene54465.t1</i>                    | <i>RbcS</i>   | GAAGGGATGGGTGCTTGCT  | GGCAACTTCCACATTGTCCAG |
| <i>MS.gene019792.t1</i>                   | <i>FBPase</i> | GACCCTTCTCTTGGCGAGTT | ATCCCAGTTCTTGGCGTTCC  |
| <i>MS.gene74217.t1</i>                    | <i>TK</i>     | CACGCAATGGGAGCAATCTG | TGGCAGCTCTCATGTAGTCG  |
| <i>MS.gene92153.t1</i>                    | <i>PGK</i>    | CTTGGCACCTCTTGTTCCCA | CTGGAAGGGAAGCCACCAAC  |
| <i>MS.gene26705.t1</i>                    | <i>SS</i>     | GAGAGCGAGATGCTCAGTCG | GACTGCATCGGGGAGAAGAC  |
| <i>MS.gene036705.t1</i>                   | <i>SPS</i>    | TGACGTTGGTCCTGGTCTTG | GCCCGAACCCAAGAACGATA  |
| <i>MS.gene25721.t1</i>                    | <i>AGPase</i> | ATTCTGTGCTTGGACTGCGA | GGAACACTGCCTTTAGCAGC  |
| <i>MS.gene06703.t1</i>                    | <i>SSS</i>    | AGGCGCTCAAGAAGTTGGTT | CCTTAAACGTCCCGTGCTTG  |
| <i>MS.gene051360.t1</i>                   | <i>SBE</i>    | AGTTAGGCTTCACACGCAGT | CCACACACCAAAATCGTCCC  |
| <i>MS.gene01471.t1</i>                    | <i>SP</i>     | AGTTTCCGACGAAGGTTGCT | AACCTCCCATGCTTCATCCC  |
|                                           | <i>Actin</i>  | CCCCATTGAGCACGGTATTG | GGGTTAAGTGGAGCCTCAGT  |

Table S2. Results of one-way ANOVA of effect of light intensity treatment on plant height, stem diameter, abaxial leaf petiole angle, specific leaf weight, shoot dry matter, root dry matter and root to shoot ratio of alfalfa plants.

| Source    | df <sup>a</sup> | Plant height<br>(cm) | Stem diameter<br>(mm) | Abaxial leaf petiole<br>angle (° ) | Specific leaf area<br>(cm <sup>2</sup> mg <sup>-1</sup> ) | Shoot dry matter<br>(mg plant <sup>-1</sup> ) | Root dry matter<br>(mg plant <sup>-1</sup> ) | Root to shoot<br>ratio |
|-----------|-----------------|----------------------|-----------------------|------------------------------------|-----------------------------------------------------------|-----------------------------------------------|----------------------------------------------|------------------------|
| Treatment | 4               | 22.5***              | 24.2***               | 44.0***                            | 121.4***                                                  | 44.2***                                       | 121.5***                                     | 16.4***                |

\*\*\*; *F*-value significant at  $P < 0.001$ .

<sup>a</sup> df, degree of freedom

Table S3. Results of one-way ANOVA of effect of light intensity treatment on root length (RL), root surface (RS), root volume (RV), and root diameter (RD) of alfalfa plants.

| Source    | df <sup>a</sup> | RL<br>(cm) | RS<br>(cm <sup>2</sup> ) | RV<br>(cm <sup>3</sup> ) | RD<br>(mm) |
|-----------|-----------------|------------|--------------------------|--------------------------|------------|
| Treatment | 4               | 292.6***   | 144.2***                 | 71.9***                  | 73.1***    |

\*\*\*, *F*-value significant at  $P < 0.001$ .

<sup>a</sup> df, degree of freedom

Table S4. Results of one-way ANOVA of effect of light intensity treatment on Chlorophyll a (Chl a), Chlorophyll b (Chl b), carotenoids (Car), Chl a + b, Chl a/b and leaf nitrogen content (LNC) of alfalfa plants.

| Source    | df <sup>a</sup> | Chl a<br>( $\mu\text{g cm}^{-2}$ ) | Chl b<br>( $\mu\text{g cm}^{-2}$ ) | Car<br>( $\mu\text{g cm}^{-2}$ ) | Chl a + b<br>( $\mu\text{g cm}^{-2}$ ) | Chl a/b | LNC<br>(mg/g) |
|-----------|-----------------|------------------------------------|------------------------------------|----------------------------------|----------------------------------------|---------|---------------|
| Treatment | 4               | 4.1*                               | 7.9***                             | 5.8**                            | 5.6**                                  | 2.6*    | 210.6***      |

\*, \*\*, and \*\*\*; *F*-value significant at  $P < 0.05$ ,  $P < 0.01$  and  $P < 0.001$ , respectively.

<sup>a</sup> df, degree of freedom

Table S5. Results of one-way ANOVA of effect of light intensity treatment on net photosynthetic rate ( $P_n$ ), transpiration rate ( $T_r$ ), intercellular CO<sub>2</sub> concentration ( $C_i$ ), and stomatal conductance ( $g_s$ ) of alfalfa plants.

| Source    | df <sup>a</sup> | $P_n$<br>( $\mu\text{mol CO}_2 \text{ m}^{-2} \text{ s}^{-1}$ ) | $T_r$<br>( $\text{mmol H}_2\text{O m}^{-2} \text{ s}^{-1}$ ) | $C_i$<br>( $\text{mol CO}_2 \text{ mol}^{-1}$ ) | $g_s$<br>( $\text{mol H}_2\text{O m}^{-2} \text{ s}^{-1}$ ) |
|-----------|-----------------|-----------------------------------------------------------------|--------------------------------------------------------------|-------------------------------------------------|-------------------------------------------------------------|
| Treatment | 4               | 73.9***                                                         | 9.4***                                                       | 26.9***                                         | 7.3**                                                       |

\*\*, and \*\*\*;  $F$ -value significant at  $P < 0.01$  and  $P < 0.001$ , respectively.

<sup>a</sup> df, degree of freedom

Table S6. Results of one-way ANOVA of effect of light intensity treatment on maximal PSII quantum yield ( $F_v/F_m$ ), effective PSII quantum yield ( $\Phi_{PSII}$ ), non-photochemical quenching (NPQ) and electron transport rate (ETR) of alfalfa plants.

| Source    | df <sup>a</sup> | $F_v/F_m$ | $\Phi_{PSII}$ | NPQ     | ETR      |
|-----------|-----------------|-----------|---------------|---------|----------|
| Treatment | 4               | 16.4***   | 32.5***       | 20.8*** | 384.8*** |

\*\*\*,  $F$ -value significant at  $P < 0.001$ .

<sup>a</sup> df, degree of freedom

Table S7. Results of one-way ANOVA of effect of light intensity treatment on soluble sugar (SS), sucrose, and starch (St) content of alfalfa plants.

| Source    | df <sup>a</sup> | SS<br>(mg/g) | Sucrose<br>(mg/g) | St<br>(mg/g) |
|-----------|-----------------|--------------|-------------------|--------------|
| Treatment | 4               | 185.9***     | 195.5***          | 481.1***     |

\*\*\*, *F*-value significant at  $P < 0.001$ .

<sup>a</sup> df, degree of freedom



Table S8. Results of one-way ANOVA of effect of light intensity treatment on activity of Rubisco (Rubisco), ribulose-1,5-bisphosphate carboxylase/oxygenase activase (RAC), fructose-1,6-bisphosphatase (FBPase), and thioredoxin reductase (TRXs), sucrose synthase (SS) and sucrose phosphate synthase (SPS), adenosine diphosphate glucose pyrophosphorylase (AGPase), soluble starch synthase (SSS), starch branching enzyme (SBE), and starch phosphorylase (SP) of alfalfa plants.

| Source    | df <sup>a</sup> | RAC<br>(U ml <sup>-1</sup> ) | Rubisco<br>(U ml <sup>-1</sup> ) | FBPase<br>(U ml <sup>-1</sup> ) | TRXs<br>(U ml <sup>-1</sup> ) | SS<br>(U ml <sup>-1</sup> ) | SPS<br>(U ml <sup>-1</sup> ) | AGPase<br>(U ml <sup>-1</sup> ) | SSS<br>(U ml <sup>-1</sup> ) | SBE<br>(U ml <sup>-1</sup> ) | SP<br>(U ml <sup>-1</sup> ) |
|-----------|-----------------|------------------------------|----------------------------------|---------------------------------|-------------------------------|-----------------------------|------------------------------|---------------------------------|------------------------------|------------------------------|-----------------------------|
| Treatment | 4               | 156.4***                     | 472.7***                         | 48.6***                         | 361.3***                      | 25.1***                     | 44.5***                      | 110.2***                        | 250.4***                     | 86.8***                      | 1105.4***                   |

\*\*\*, *F*-value significant at  $P < 0.001$ .

<sup>a</sup> df, degree of freedom

Table S9. Results of one-way ANOVA of effect of light intensity treatment on gene expression level of *RCA*, *RbcL*, *RbcS*, *FBPase*, *TK*, *PGK*, *SPS*, *SS*, *AGP*, *SSS*, *SBE*, and *SP* of alfalfa plants.

| Source    | df <sup>a</sup> | <i>RCA</i> | <i>RbcL</i> | <i>RbcS</i> | <i>FBPase</i> | <i>TK</i> | <i>PGK</i> | <i>SPS</i> | <i>SS</i> | <i>AGP</i> | <i>SSS</i> | <i>SBE</i> | <i>SP</i> |
|-----------|-----------------|------------|-------------|-------------|---------------|-----------|------------|------------|-----------|------------|------------|------------|-----------|
| Treatment | 4               | 313.6***   | 194.4***    | 121.2***    | 52.4***       | 110.1***  | 80.4***    | 126.8***   | 269.3***  | 368.9***   | 341.9***   | 135.2***   | 400.9***  |

\*\*\*; *F*-value significant at  $P < 0.001$ .

<sup>a</sup> df, degree of freedom
